**A-69 Room E, 10/17/2000 9:00 AM - 11:00 AM (PS)**  
**Propofol, Ketamine and Etomidate Alter Calcium Sensitivity in Mammalian Skeletal Muscle** Gudrun Kunst, M.D.; Bernhard M. Graf, M.D.; Eike Martin, M.D.; Rainer H.A. Fink, Ph.D., Dept. Anesthesiology, University of Heidelberg, Heidelberg, Germany. Propofol, etomidate and ketamine increase calcium sensitivity of contractile proteins in saponin skinned skeletal muscle fibers at supraclinical concentrations.

**A-70 Room E, 10/17/2000 9:00 AM - 11:00 AM (PS)**  
**Inhibition of the Action of Phospholipase A2 Towards Cell Membranes Reduces Leucocyte Activation In Vivo** Jens Lindert, MD; Joachim Werner, MD; Axel R. Pries, MD; Saul Yedgar, PhD; Hermann Kuppe, MD, Institute of Anesthesiology, Deutsches Herzzentrum Berlin, Berlin, Germany. Protection of cell membranes against Phospholipase A2 reduces leucocyte activation in ischemia/reperfusion.

**A-71 Room E, 10/17/2000 9:00 AM - 11:00 AM (PS)**  
**A Comparison of Remifentanyl Based Anesthesia with Sevoflurane or Propofol for Brachial Plexus Surgery** Panorea D. Mavrommati, MD; Zoe T. Gabopoulou, MD; Vassiliki A. Vrettou, MD; Matheos M. Petsicopoulos, MD; Kyriaki G. Velmachou, MD, Anesthesiology, KAT, Athens, Greece

**A-72 Room E, 10/17/2000 9:00 AM - 11:00 AM (PS)**  
**NMDA Receptor, but Not Sigma Receptor, Is Involved in Ketamine-Induced c-Fos Expression in the Mice Posterior Cingulate Cortex** Shin-ichi Nakao, MD, PhD; Nobuyasu Nishizawa, MD; Munehiro Masuzawa, MD, Anesthesiology, Kansai Medical University, Moriguchi, Osaka, Japan. Ketamine-induced c-Fos expression in the mice posterior cingulate cortex was mediated by NMDA receptor.

**A-73 Room E, 10/17/2000 9:00 AM - 11:00 AM (PS)**  
**Predictive Performance of a TCI System for Anesthesia during Whole Body Hyperthermia** A. Nierhaus, MD; C. Meissner; S. Hegewisch, MD; C. Schneider, MD; J. Schulte am Esch, MD, Anesthesiology, University Hospital, Hamburg, Germany. In a series of 11 patients, predicted plasma levels of propofol are systematically underestimated during whole body hyperthermia by a common pharmacokinetic model.

**A-74 Room E, 10/17/2000 9:00 AM - 11:00 AM (PS)**  
**Effects of Propofol on Cerebral Blood Flow - Evaluation Using Positron Emission Tomography** K. Ogawa, M.D.; M. Nishikawa, M.D.; T. Uema, M.D.; U. Takayama, M.D.; F. Okumura, M.D., Anesthesiology, Yokohama City University School of Medicine, Yokohama, Japan. Propofol significantly reduced mean CBF, and the relative rCBF decreased in parieto-occipital area, pulvinar and brainstem reticular formation.

**A-75 Room E, 10/17/2000 9:00 AM - 11:00 AM (PS)**  
**Propofol-Induced Relaxation of Rat Aorta Is Altered by Aging** Yoko Sakai, M.D.; Hiroshi Kitabata, M.D.; Yutaka Nakaya, M.D.; Syuzo Oshita, M.D., Department of Anesthesiology, Tokushima University School of Medicine, Tokushima, Japan. Propofol induces vasodilation in both young and adult rats. Whereas, vasodilation by endothelial NO was observed only in young rats. These results suggest propofol might produce greater vasodilation in young animals than in old animals.

**A-76 Room E, 10/17/2000 9:00 AM - 11:00 AM (PS)**  
**Aminophylline Reduces Recovery Time from Propofol/Fentanyl Anesthesia** S. Sakurai, DDC; A.F. Fukunaga, MD; Y. Kaneko, DDS; T. Ichinobe, DDS; M. Hayashi, DDS, Dental Anesthesiology, Tokyo Dental College, Chiba-shi, Chiba, Japan. This study shows that aminophylline can safely reduce the recovery time from prolonged propofol/fentanyl anesthesia in major orthognathic surgery.

**A-77 Room E, 10/17/2000 9:00 AM - 11:00 AM (PS)**  
**Propofol Does Not Induce Enzyme Leakage in Rat Liver In Vitro** Teruko Sameshima, PhD; Yosbitami Kadota, MD; Takeshi Tsurumaru, MD; Katubiro Obse, MD; Yuichi Kanmura, MD, Anesthesiology and CCM, Kagoshima University School of Medicine, Kagoshima, Japan. Propofol did not exhibit hepatotoxicity in rat liver slices, even with two times the clinically used concentration.

**A-78 Room E, 10/17/2000 9:00 AM - 11:00 AM (PS)**  
**Does Sufentanil Improve the Analgesic Quality of Popliteal Block after Hallux Valgus Surgery ?** Daniele Saurel, MD; Vincent Fenies, MD; Dominique Groslier, MD; Christophe Frey; Jean E. Bazin, MD, PhD, Department of Anesthesia, CHRU, Clermont-Ferrand, France. Local administration of sufentanil bring no benefit in terms of duration and quality of postoperative analgesia in popliteal sciatic block.

**A-79 Room E, 10/17/2000 9:00 AM - 11:00 AM (PS)**  
**Propofol TCI in Elderly Patients: Optimizing Administration** Frederique S. Servin, MD; Gilles Peytavin; Jean-Marie Desmonts, MD, Anesthesia, Hopital Bichat, Paris, France. Propofol PK/PD relationships were determined in the elderly as well as the adequacy of Marsh's PK model. Marsh's model performed poorly during induction, and adequately during recovery.

**A-80 Room E, 10/17/2000 9:00 AM - 11:00 AM (PS)**  
**Clonidine Attenuates Aluminium Fluoride-Induced Phosphatidylinositol Response of Rat Trachea** Osamu Shibata, M.D.; Masataka Saito, M.D.; Tetsuji Makita, M.D.; Hiroaki Morooka, M.D.; Koji Sumikawa, M.D., Department of Anesthesiology, Nagasaki University Hospital, Nagasaki, Japan. Clonidine would inhibit G-protein coupled phospholipase C.

**A-81 Room E, 10/17/2000 9:00 AM - 11:00 AM (PS)**  
**Lethal Dose of S(+) Ketamine Is Reduced by Pre-Treatment with Propranolol** R.T. Sudo, M.D., Ph.D.; P. Terra, M.D.; G. Zapata-Sudo, M.D., Ph.D., Dept. of Basic and Clin. Pharmacol., UFRJ, Rio de Janeiro, Brazil. Indirect sympathetic activation explains the lower cardiovascular toxicity of S(+) ketamine in comparison with R(-) ketamine.

**A-82 Room E, 10/17/2000 9:00 AM - 11:00 AM (PS)**  
**Tracheal Intubation without Muscle Relaxant: Comparaison between Alfentanil/Propofol, Remifentanil/Propofol, or Propofol/Remifentanil** Fabien Trabold, MD; Michel Casetta, MD; Kamran Samii, MD; Dan Benhamou, MD; Philippe Sitbon, MD, Anesthesiology, CHU de Bicetre, Le Kremlin Bicetre, France. Remifentanil administered after propofol provides good intubating conditions.
